# Supplementary material for: Biological clock function is linked to proactive and reactive personality types
Source: PubMed Central journal article supplement (PMC6303931; doi:10.1186/s12915-018-0618-0), 2018-12-21

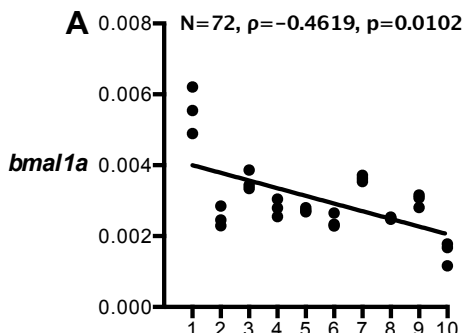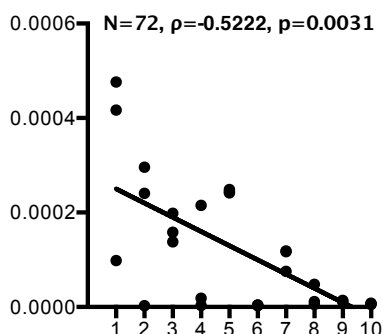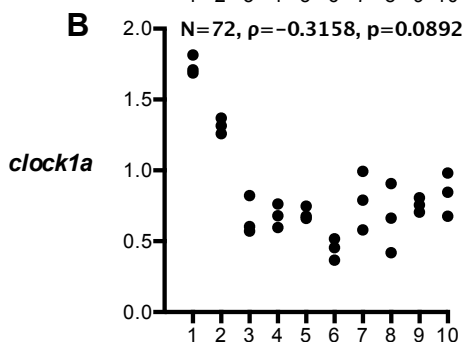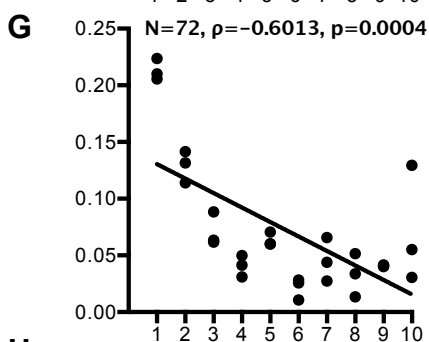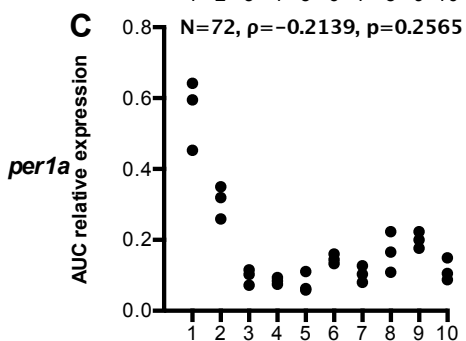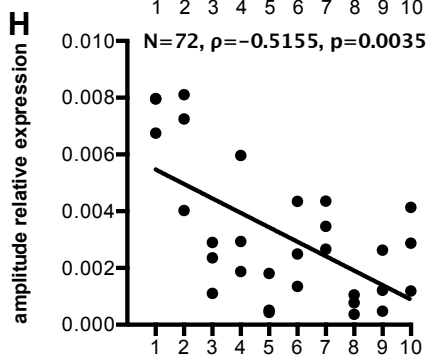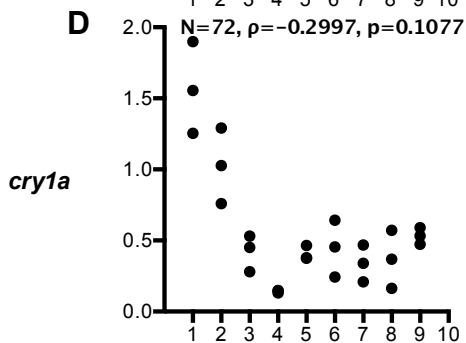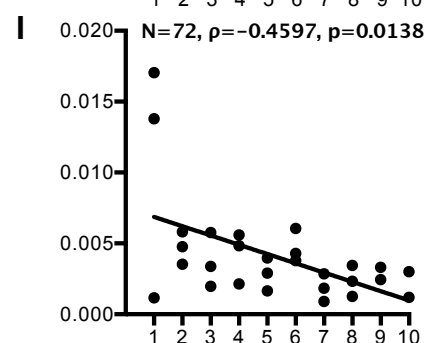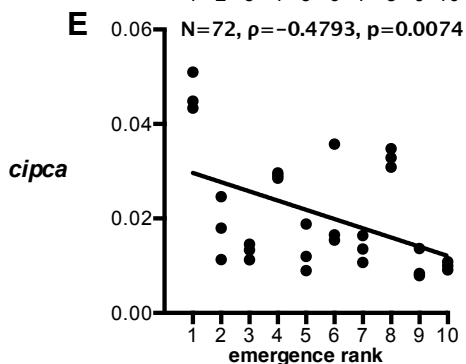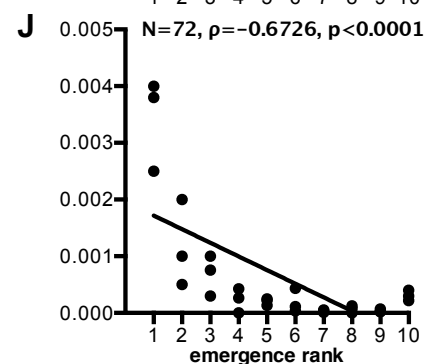

Supplement: 12915_2018_618_MOESM4_ESM.pdf [file 12915_2018_618_MOESM4_ESM.pdf]
